# Supplementary material for: Increase in Cell Wall Thickening and Biomass Production by Overexpression of PmCesA2 in Poplar
Source: PubMed Central journal article supplement (PMC7044265; doi:10.3389/fpls.2020.00110), 2020-02-20
Supplement: DataSheet_1.pdf [file DataSheet_1.pdf]

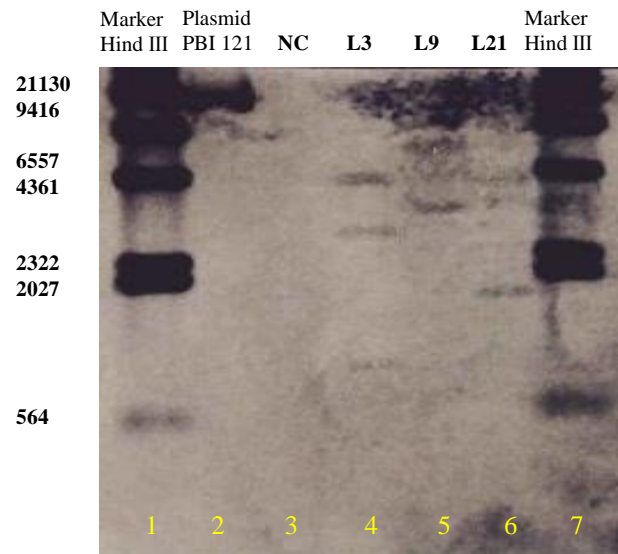

**Figure S1.** Southern blot analysis of transgene (*PmCesA2*). Lane 1: Marker, Lane 2: *PBI121:CesA2* plasmid, Lane 3: Negative Control (DNA of untransformed plant), Lane 4–6: genomic DNA extracted from three transgenic poplar lines. Lane 7: Marker.
