# Supplementary material for: Increase in Cell Wall Thickening and Biomass Production by Overexpression of PmCesA2 in Poplar
Source: PubMed Central journal article supplement (PMC7044265; doi:10.3389/fpls.2020.00110), 2020-02-20
Supplement: DataSheet_2.pdf [file DataSheet_2.pdf]

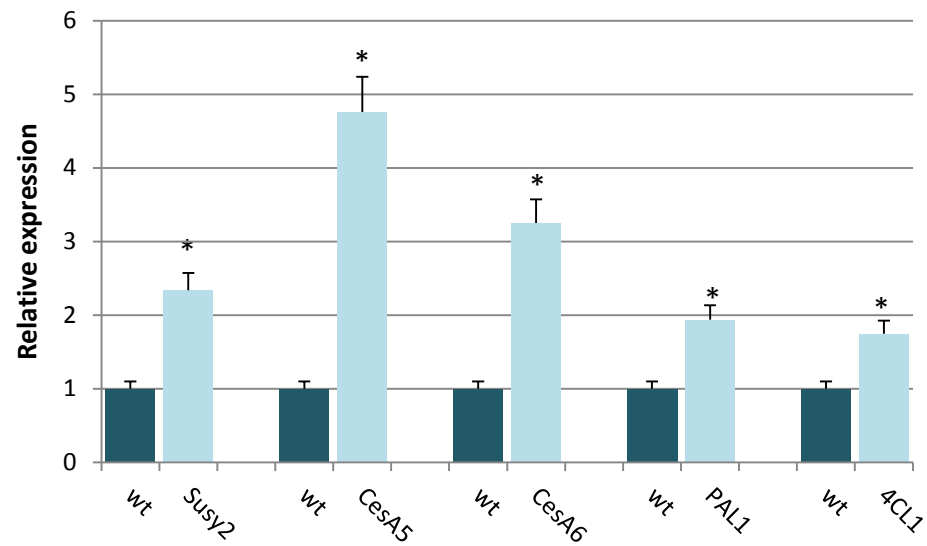

**Figure S2.** Relative transcript levels of *Susy2*, *CesA5*, *CesA6*, *PAL1*, and *4CL1*. Actin was used as the internal control. All values are expressed as means  $\pm$  SD; (n = 3 biological replicates), \* denotes significance at  $p < 0.05$ .
